# Supplementary material for: Validation of formaldehyde products from three satellite retrievals (OMI SAO, OMPS-NPP SAO, and OMI BIRA) in the marine atmosphere with four seasons of ATom aircraft observations
Source: Copernicus journal article supplement (doi:10.5194/amt-2024-72), 2024-05-13
Supplement: Supplementary file 1 [file amt-2024-72-supplement.pdf]

## Supplementary material

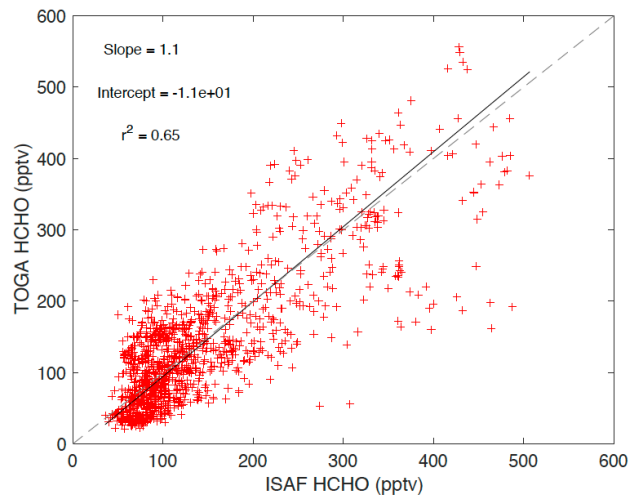

Figure S1. TOGA HCHO measurements vs. ISAF HCHO measurements during ATom-4 over oceans. Equally weighted linear regression yields a slope of 1.1 and an intercept of -11. The correlation coefficient  $r^2 = 0.65$ .

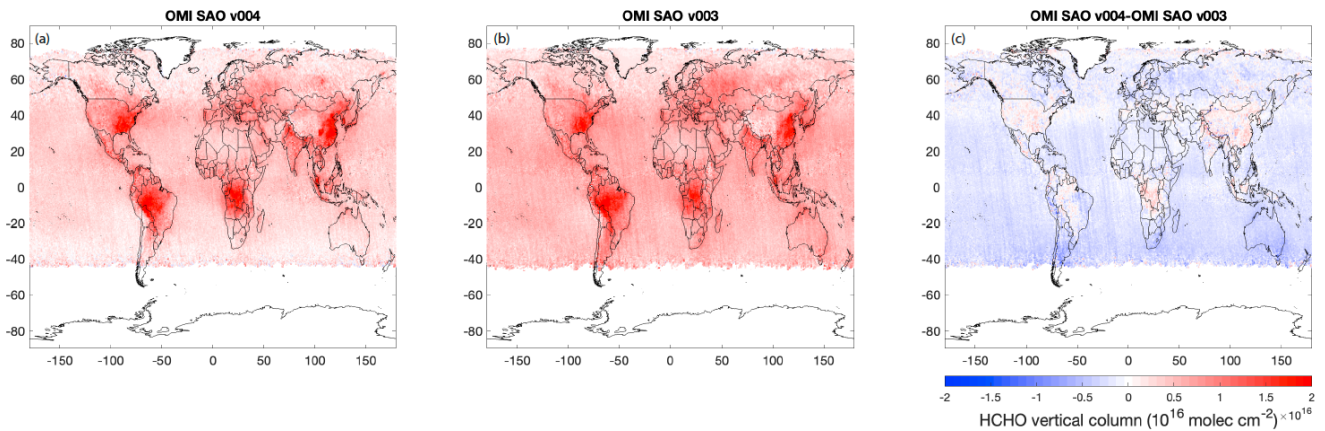

Figure S2. Global map of average HCHO vertical column over ATom-1 sampling period for (a) OMI SAO (v004), (b) OMI SAO (v003), and (c) their differences.

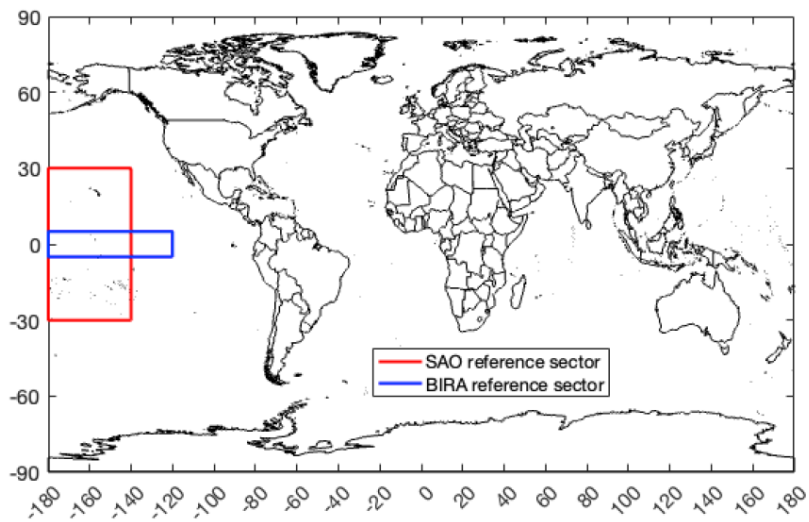

10

11

12

13 **Figure S3. Map of the approximate reference sector locations in SAO and BIRA retrievals for reference spectrum and**  
14 **background HCHO addition. The SAO retrieval reference sector location slightly varies depending on the locations of**  
15 **the closest satellite crossing.**
